# Supplementary material
Source: publisher figshare collection journal article supplement (https://acs.figshare.com/ndownloader/files/14847203)
Supplement: Supplementary file 1 [file 14847203]

## Supporting Information

### Evolution of Pd Species for the Conversion of Methane under Operation Conditions

Jianjun Chen,<sup>a</sup> Yang Wu,<sup>a</sup> Wei Hu,<sup>b, c</sup> Pengfei Qu,<sup>b</sup> Guochen Zhang,<sup>b</sup> Yi Jiao,<sup>a</sup>  
Lin Zhong<sup>b \*</sup>, and Yaoqiang Chen<sup>a, b, d \*</sup>

<sup>a</sup> Institute of New Energy and Low-carbon Technology, Sichuan University,  
Chengdu 610064, China

<sup>b</sup> College of Chemical Engineering, Sichuan University, Chengdu 610064,  
China

<sup>c</sup> Institute of Atmospheric Environment, Chongqing Academy of Environmental  
Science, Chongqing 401147, China

<sup>d</sup> College of Chemistry, Sichuan University, Chengdu 610064, China

Corresponding author: Lin Zhong (Email: [zhonglin@scu.edu.cn](mailto:zhonglin@scu.edu.cn); Tel/Fax:  
+86-28-85418451)

Corresponding author: Yaoqiang Chen (Email: [nic7501@scu.edu.cn](mailto:nic7501@scu.edu.cn); Tel/Fax:  
+86-28-85418451)

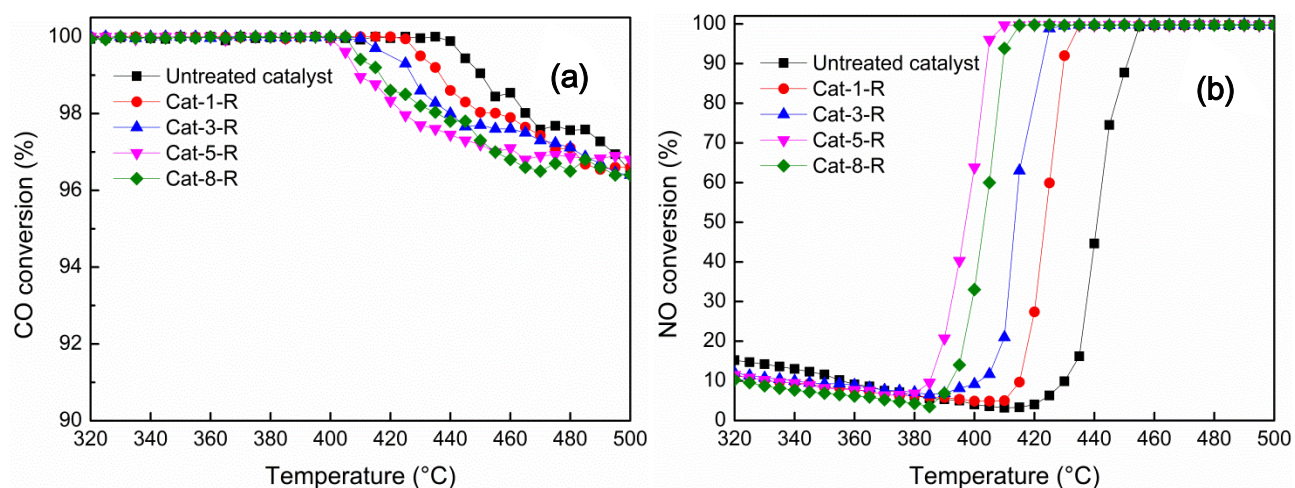

**Figure S1.** (a) CO and (b) NO light-off curves as temperature was raised from 300 to 500 °C in simulated stoichiometric NGVs exhaust gas for the Pd model catalyst (50 g/ft<sup>3</sup>) after pretreated in reaction gas. Conditions: 1000 ppm CH<sub>4</sub> + 5000 ppm CO + 930 ppm NO + 4035 ppm O<sub>2</sub> + 10vol. %CO<sub>2</sub> + 10vol. %H<sub>2</sub>O balanced with N<sub>2</sub> (lambda=1); Gas hourly space velocity (GHSV) = 50,400 h<sup>-1</sup>.

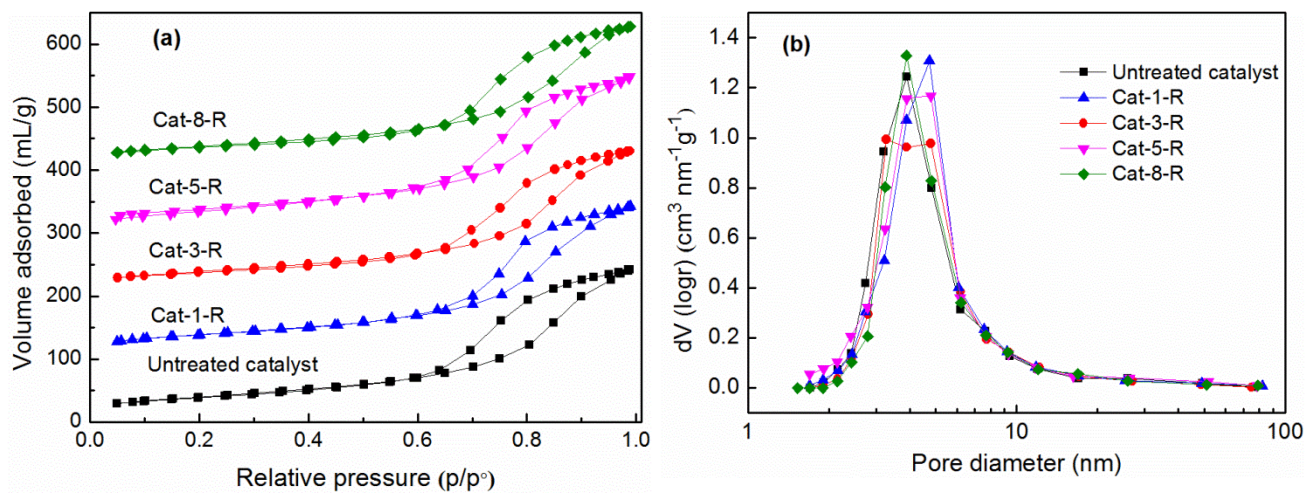

**Figure S2.** (a) Nitrogen adsorption-desorption isotherms and (b) Barrett-Joyner-Halenda

pore size distribution of the Pd model catalysts after pretreatment in reaction gas.

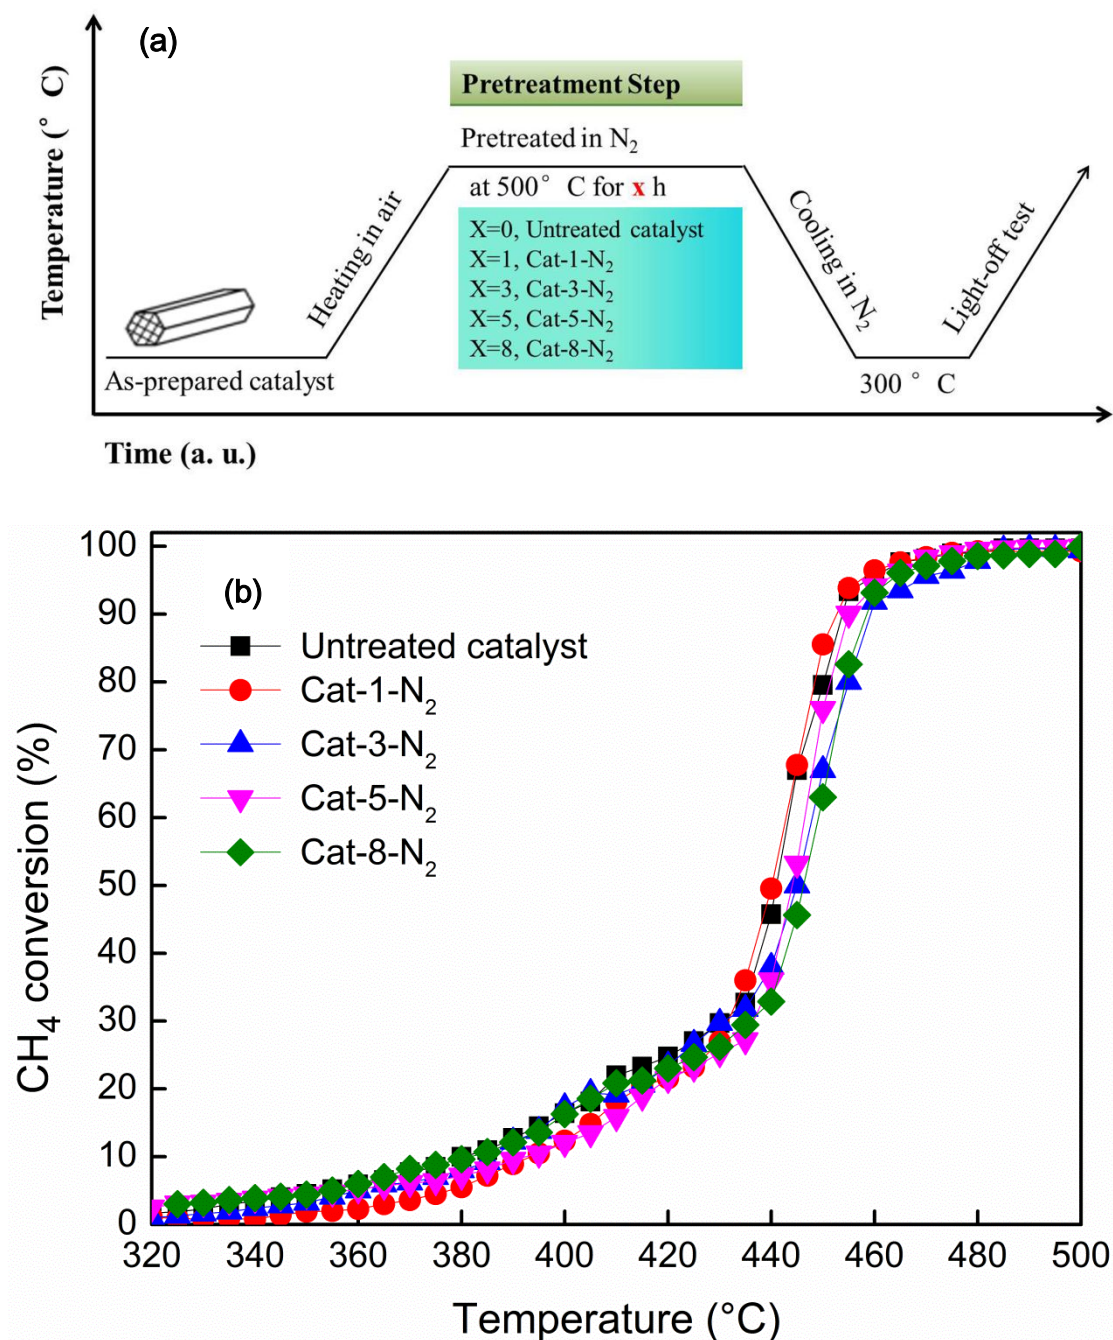

**Figure S3.** (a) Description of the pretreatment procedures under flowing  $N_2$ ; (b)  $CH_4$

light-off test for Pd model catalyst ( $50 \text{ g/ft}^3$ ) after the above pretreatment.



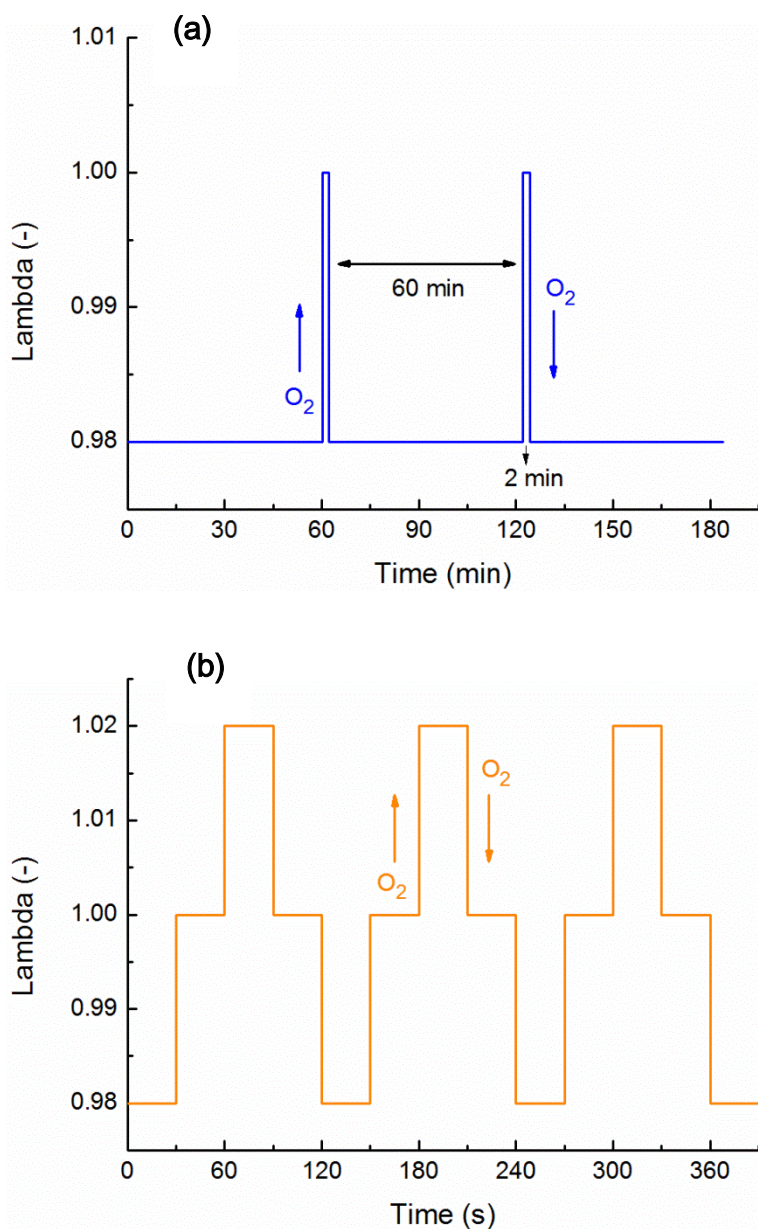

**Figure S4.** (a) Periodic pulse experiments were conducted by performing every 2 min long stoichiometric pulses ( $\lambda=1.00$ ) per 60 min on a stationary rich reaction gas mixture ( $\lambda=0.98$ ); (b) Lambda oscillating operating tests: lambda oscillation value from 0.98 to 1.02 at constant cycle period of 120 s.

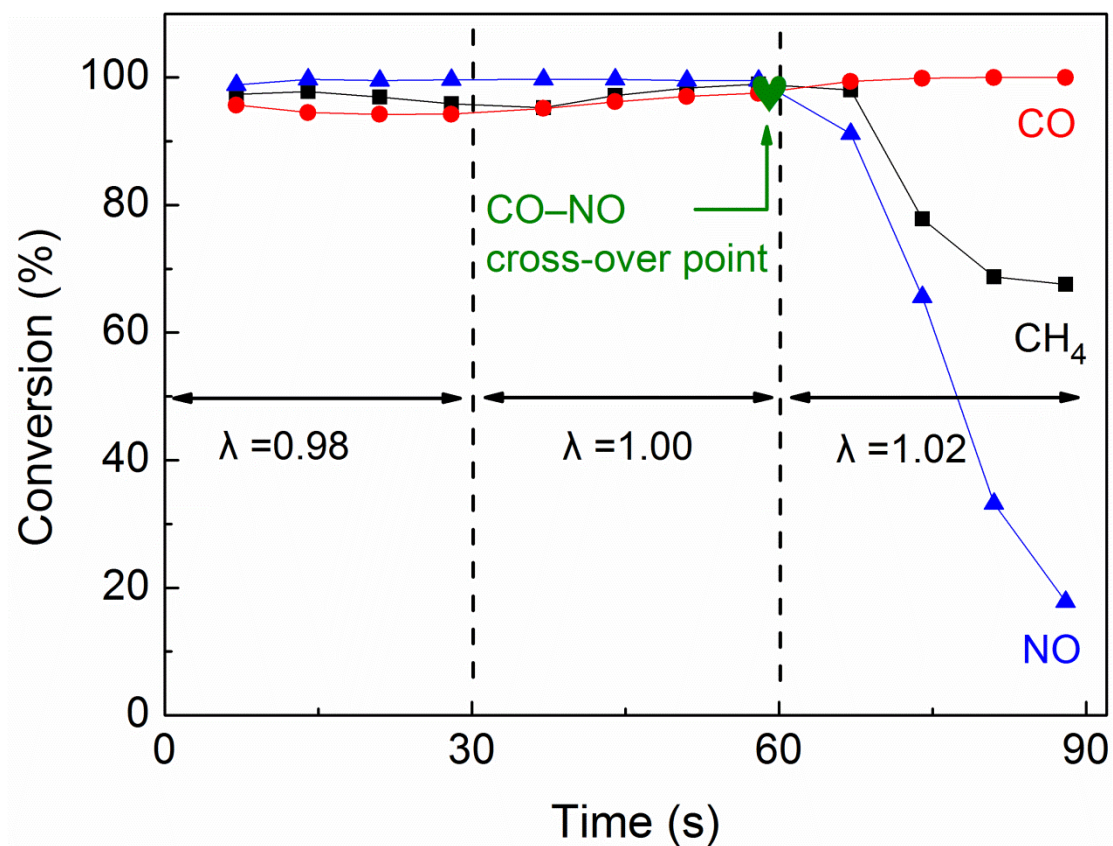

**Figure S5.** The changes in the pollutants conversion with lambda over the pretreated catalyst ( $T_{\text{oven}} = 450\text{ }^{\circ}\text{C}$ ). The time shown in the Figureure is corresponding to that in Figure. 11. The green heart-shaped point indicates the CO-NO crossover point, also indicated by a green arrow.

**Table S1.** Texture properties of the Pd model catalysts after pretreatment in reaction gas.

| Samples            | BET area (m <sup>2</sup> /g) | Pore volume (mL/g) | Mean pore radii (nm) |
|--------------------|------------------------------|--------------------|----------------------|
| Untreated catalyst | 142.8                        | 0.37               | 5.3                  |
| Cat-1-R            | 138.7                        | 0.37               | 5.4                  |
| Cat-3-R            | 139.1                        | 0.36               | 5.1                  |
| Cat-5-R            | 137.6                        | 0.38               | 5.6                  |
| Cat-8-R            | 134.9                        | 0.35               | 5.2                  |
